# Supplementary material for: Endothelial Poldip2 regulates sepsis-induced lung injury via Rho pathway activation
Source: Oxford University Press journal article supplement (doi:10.1093/cvr/cvab295), 2021-09-10
Supplement: cvab295_supplementary_data.zip [file cvab295_supplementary_data.zip]

## Supplementary Material

### **Endothelial Poldip2 Regulates Sepsis-induced Lung Injury via Rho Pathway Activation**

Dolmatova EV, Forrester SJ, Wang K, Ou Z, Williams HC, Joseph G, Kumar S, Valdivia A, Kowalczyk A, Qu H, Jo H, Lassègue B, Hernandez MS, Griendling KK

# Supplementary Figure 1

A

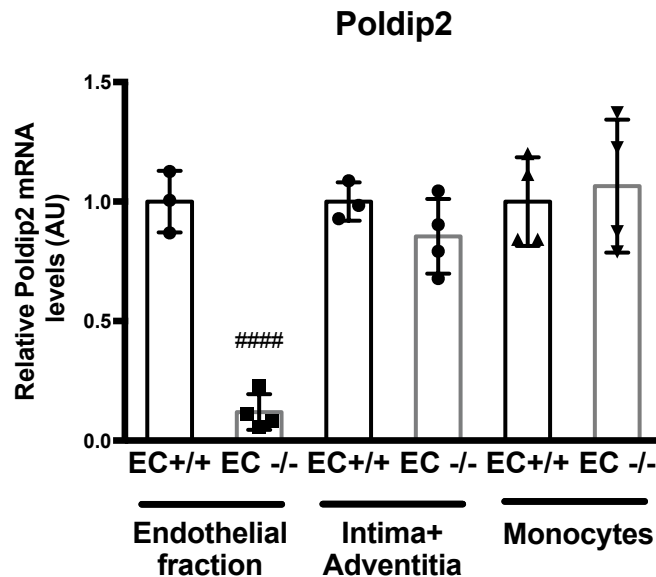

B

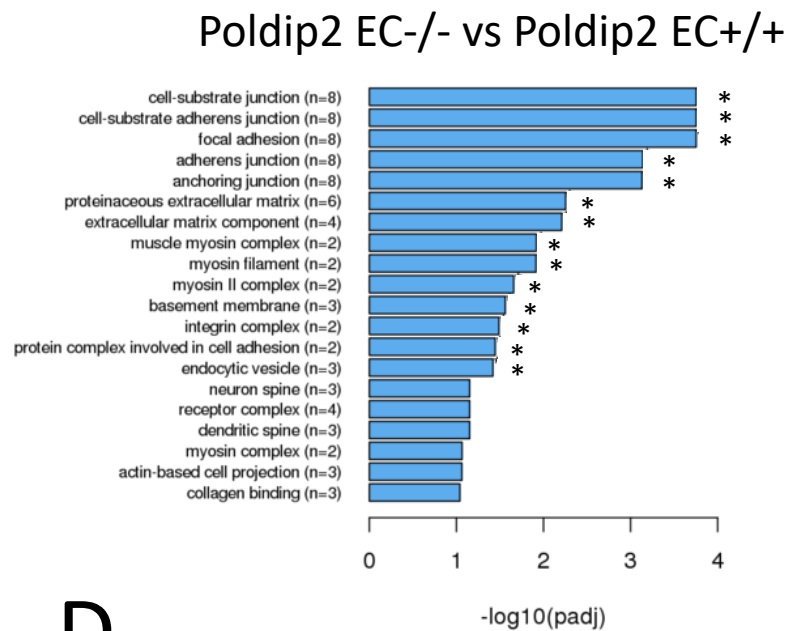

C

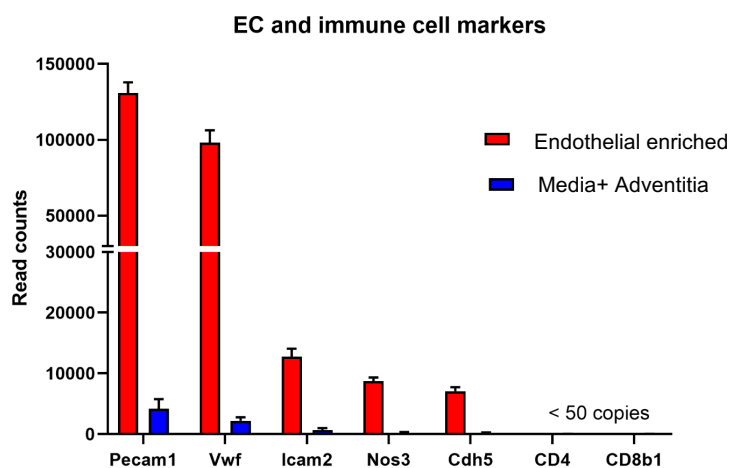

D

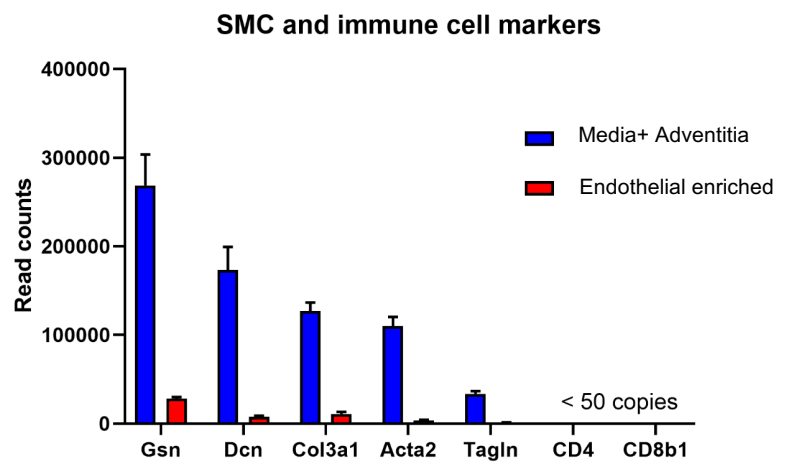

- Supplementary Figure 1.** A. Relative Poldip2 expression in endothelial, media+adventitia-enriched fraction and isolated monocytes of Poldip2 EC-/- and Poldip2 EC+/+ mice(####-p<0.0001 compared to Poldip2 EC+/+, (two-tailed T-test) ). B. Gene ontology analysis of RNASeq data of endothelial fraction from Poldip2 EC-/- and Poldip2 EC+/+ mice showing enrichment for cell substrate and adherens junction genes, \*- FDR<0.05. C and D. Comparison of the expression profiles of endothelial and media + adventitia-enriched fractions from Poldip2 EC-/. The endothelial-enriched fraction had significantly higher expression of endothelial-specific genes and had lower expression of smooth muscle specific genes. The opposite was true for the media + adventitia-enriched fraction. (n=3-4)

# Supplementary Figure 2

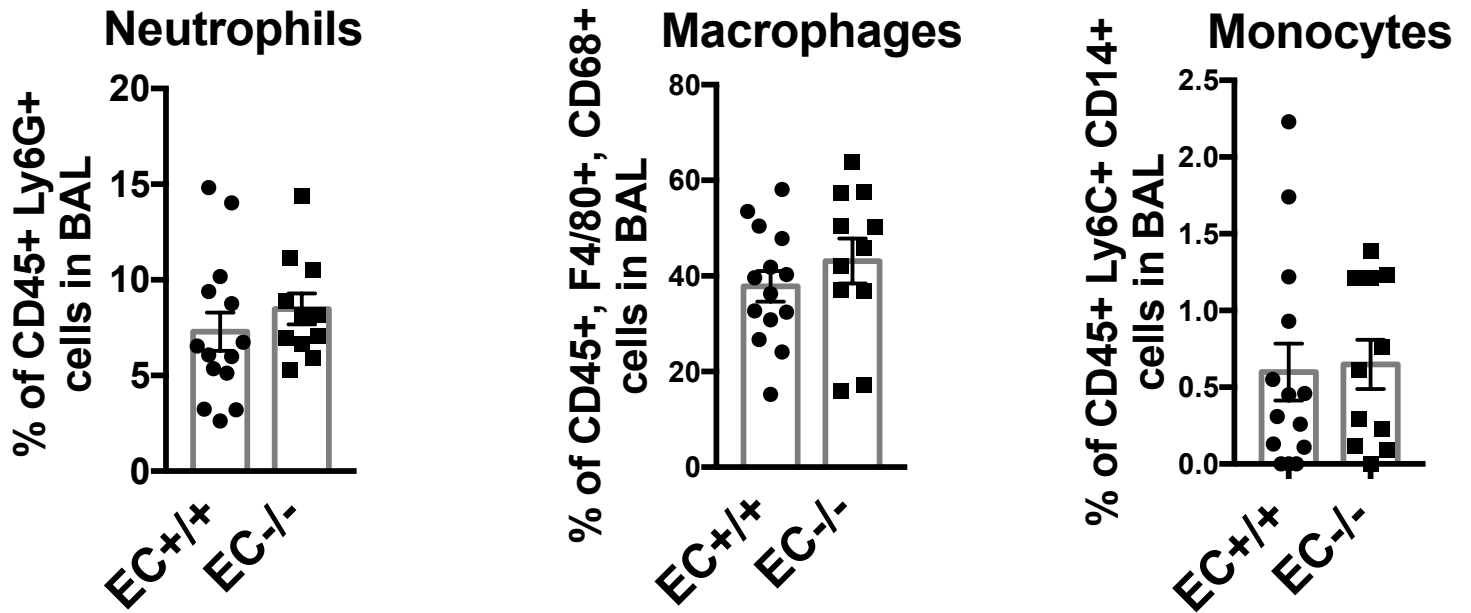

- **Supplementary Figure 2.** Composition of the cells in BAL after LPS injection showing highest percentage of macrophages, followed by neutrophils and monocytes. No significant difference in cellular composition of BAL between Poldip2 EC-/- (n=11) and Poldip2 EC+/+ (n=14) mice was noted (Two-tailed T-test).

# Supplementary Figure 3

A

## Survival proportions after LPS injection

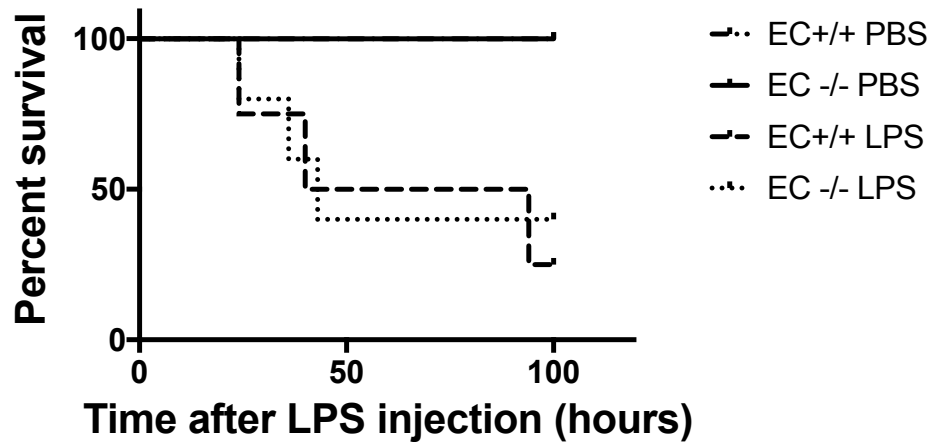

B

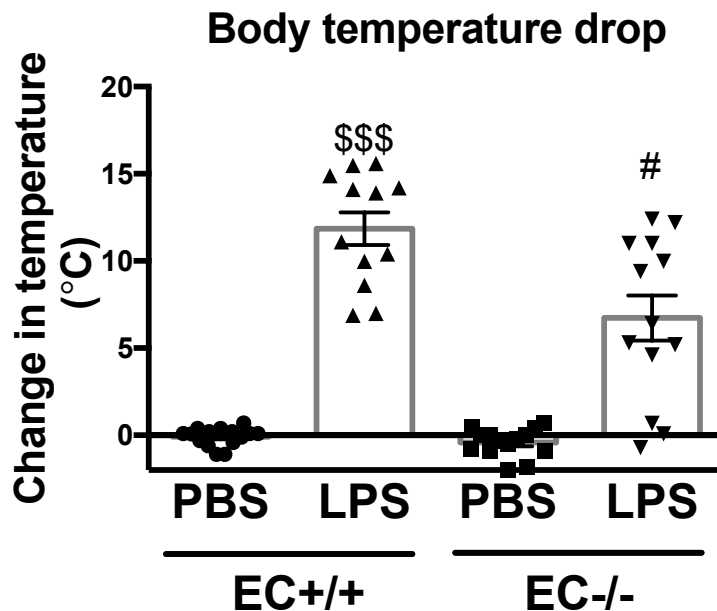

- Supplementary Figure 3.** A. Survival curves showing no significant difference in survival between Poldip2 EC+/+ and EC-/- mice (n=5). B. Sepsis severity assessment by core body temperature measurement showing significantly larger temperature drop in Poldip2 EC+/+ vs EC-/- mice after LPS injection (n=12-13 for LPS treated groups, n=14-15 for PBS treated groups). (\$\$\$- p<0.001 compared to PBS injected Poldip2 EC+/+ mice, #- p<0.05 compared to LPS injected Poldip2 EC+/+ mice, two-way ANOVA, with Tukey's correction)

# Supplementary Figure 4

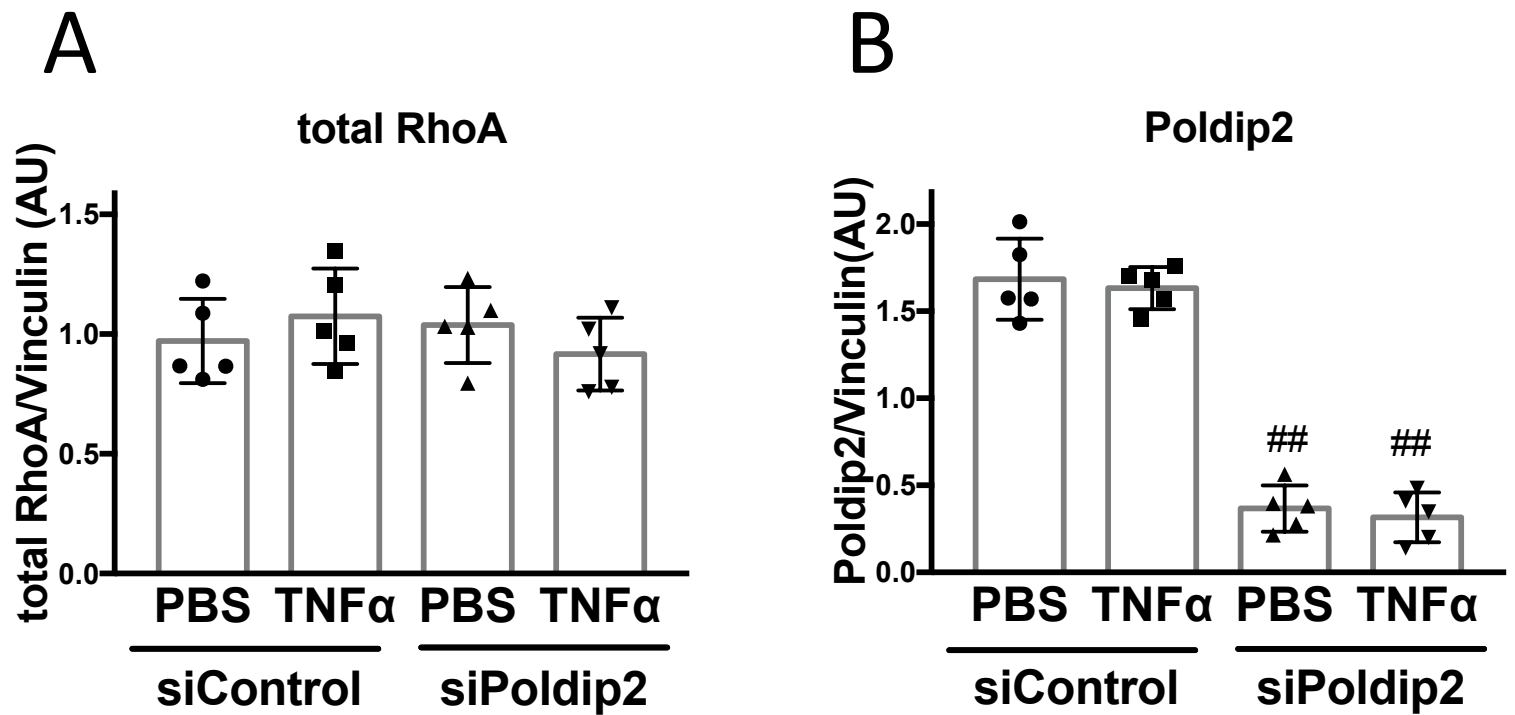

- **Supplementary Figure 4.** A. Quantification of total RhoA levels by Western Blotting in siControl and siPoldip2 treated RBMECs with and without TNF $\alpha$  stimulation. B. Quantification of Poldip2 levels and confirmation of Poldip2 knock-down in RBMECs by Western Blotting (n=5, ##- p<0.01 as compared to corresponding siControl treated cells, two-way ANOVA, with Tukey's correction)

# Supplementary Figure 5

A

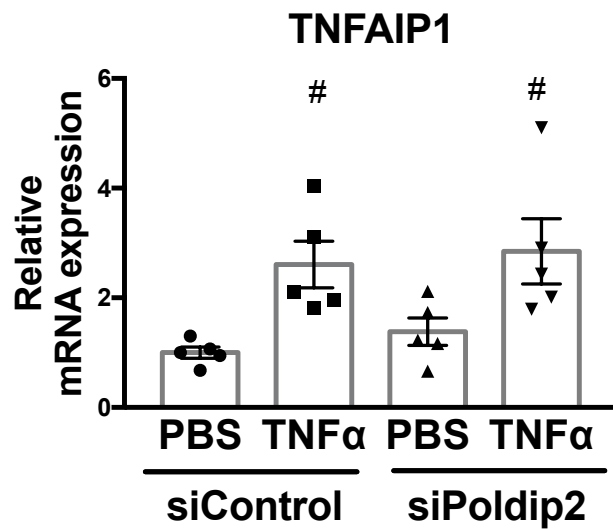

B

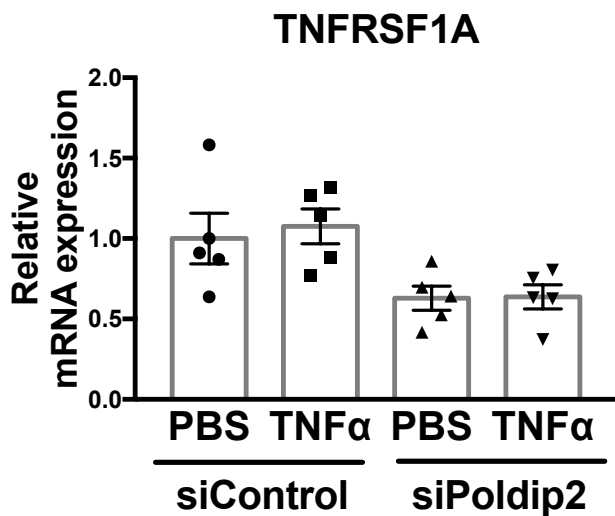

C

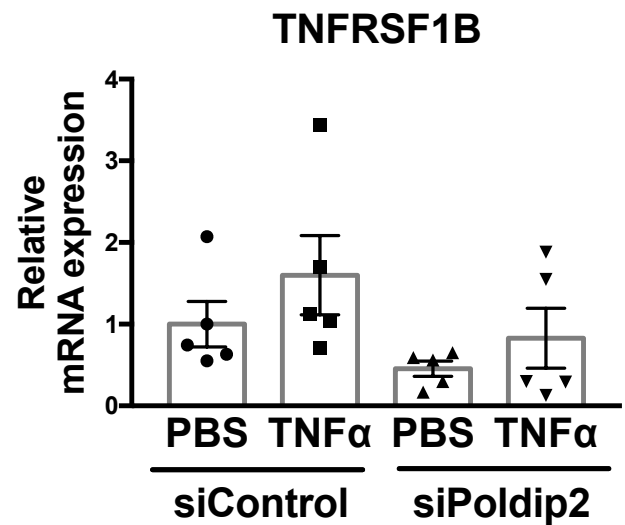

- **Supplementary Figure 5.** qPCR analysis of the expression levels of TNFAIP1(A), TNFRSF1A (B) and TNFRSF1B (C) after Poldip2 knockdown with and without TNF $\alpha$  treatment (n=5, #- p<0.05 as compared to corresponding PBS treated cells, two-way ANOVA, with Tukey's correction)

# Supplementary Figure 6 (Unedited Gels)

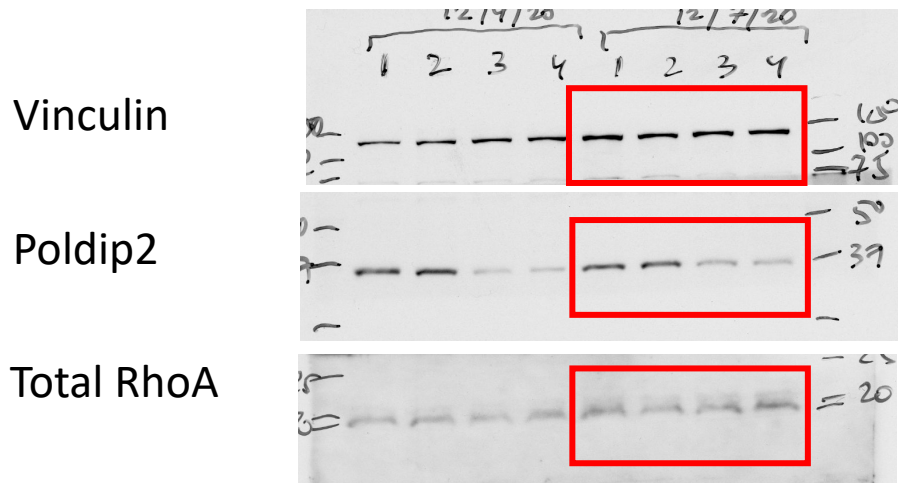

1. siControl+ vehicle
2. siControl +TNF
3. siPoldip2 + vehicle
4. siPoldip2+ TNF

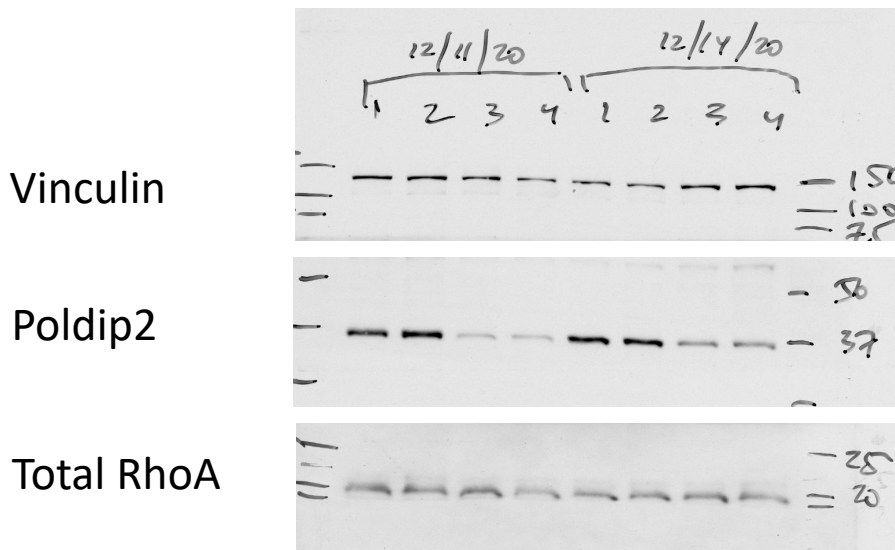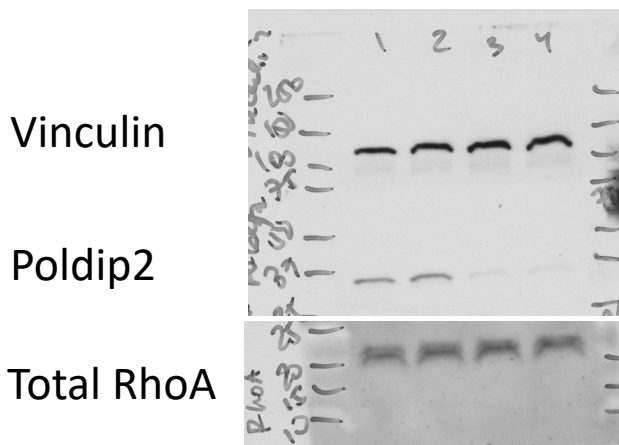

- **Supplementary Figure 6.** Unedited films of the Western blots mentioned in the paper (n=5).  
Membranes were cut to enable probing for multiple proteins simultaneously. Representative blot presented in the main manuscript is highlighted with the red frame.

# Supplementary table 1.

## qPCR primer sequences

| Gene            | Forward primer              | Reverse primer               |
|-----------------|-----------------------------|------------------------------|
| <b>Mouse</b>    |                             |                              |
| <b>Ikbα</b>     | 5'-GTTTCGCTCTTGTTGAAATG-3'  | 5'-CCACTTATAATGTCAGACGC-3'   |
| <b>Tnfα</b>     | 5'-CTATGTCTCAGCCTCTTCTC-3'  | 5'-GGCCATTTGGGAACCTTCTCA-3'  |
| <b>Cxcl1</b>    | 5'-AAAGATGCTAAAAGGTGTCC-3'  | 5'-GTATAGTGTTGTCAGAAGCC-3'   |
| <b>Cxcl2</b>    | 5'-GTTGACTTCAAGAACATCCAG-3' | 5'-CTTTCTCTTTGGTTCTTCCG-3'   |
| <b>Vcam1</b>    | 5'-GAGTGTACAGCCTCTTTATG-3'  | 5'-CTGCAGTTCCCCATTATTTAG-3'  |
| <b>Hprt</b>     | 5'-GCTGACCTGCTGGATTACAT-3'  | 5'-GGTCCTTTTCACCAGCAAGCT-3'  |
| <b>Ppia</b>     | 5'-AGCTCTGAGCACTGGAGAGA-3'  | 5'-GCCAGGACCTGTATGCTTTA-3'   |
| <b>Human</b>    |                             |                              |
| <b>TNFAIP</b>   | 5'- ACCCTACATATGACAGAACC-3' | 5'- TTAGGGTAGAAAGACATGGG- 3' |
| <b>TNFRSF1A</b> | 5'- CCCCTGGTCATTTTCTTTG- 3' | 5'- ATTTCCCACAAACAATGGAG- 3' |
| <b>TNFRSF1B</b> | 5'- AGCACTGGCGACTTC- 3'     | 5'- ACAAGGGCTTCTTTTTCAC- 3'  |
